# Supplementary material
Source: PubMed Central journal article supplement (PMC6232842)
Supplement: NIHMS786948-supplement-Supporting_Information.pdf [file NIHMS786948-supplement-Supporting_Information.pdf]

## Supporting Information

### **Multiparametric Biomechanical and Biochemical Phenotypic Profiling of Single Cancer Cells Using Elasticity Microcytometer**

Shuhuan Hu<sup>a</sup>, Guangyu Liu<sup>b</sup>, Weiqiang Chen<sup>b,c</sup>, Xiang Li<sup>b</sup>, Wei Lu<sup>b</sup>, Raymond H. W. Lam<sup>a,b,d\*</sup>,  
and Jianping Fu<sup>b,e,f\*</sup>

<sup>a</sup>Department of Mechanical and Biomedical Engineering, City University of Hong Kong, Hong Kong; <sup>b</sup>Department of Mechanical Engineering, University of Michigan, Ann Arbor, Michigan 48109, USA; <sup>c</sup>Department of Mechanical and Aerospace Engineering, New York University, New York 11201, USA; <sup>d</sup>City University of Hong Kong Shenzhen Research Institute, Shenzhen, China; <sup>e</sup>Department of Biomedical Engineering, University of Michigan, Ann Arbor, Michigan 48109, USA; <sup>f</sup>Department of Cell and Developmental Biology, University of Michigan, Ann Arbor, Michigan 48109, USA.

\*Correspondence: [jpfu@umich.edu](mailto:jpfu@umich.edu), [rhwlam@cityu.edu.hk](mailto:rhwlam@cityu.edu.hk)

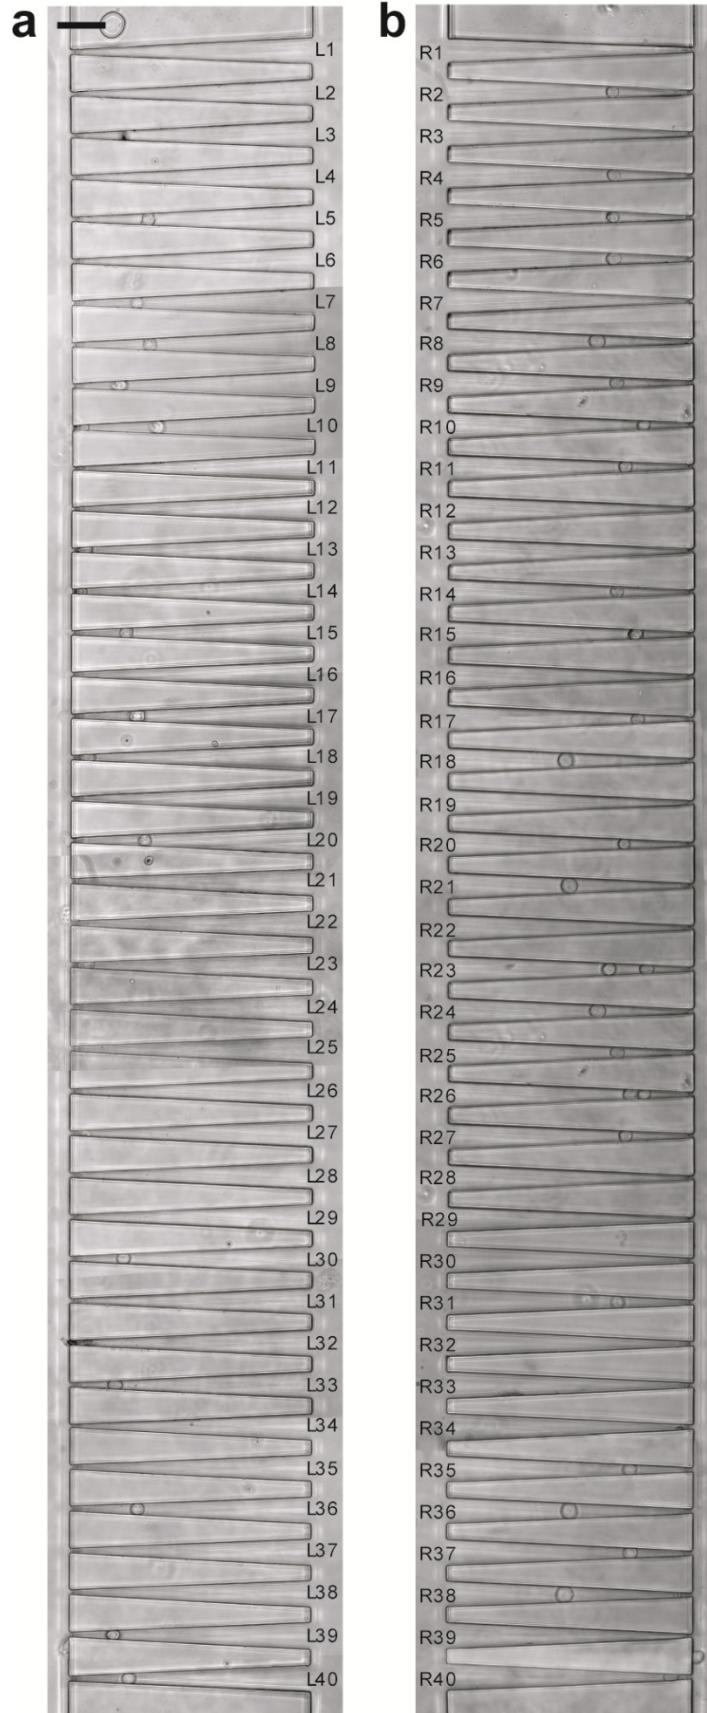

**Figure S1.** Left (a) and right (b) confining channel arrays capturing single MCF-10A cells. Most confining channels contained only one cell per channel. In rare cases, multiple single cancer cells were observed to be trapped together in the same confining channels (*e.g.* L10, R23 and R26). These cells were discarded for data analysis. Scale bar, 50  $\mu\text{m}$ .

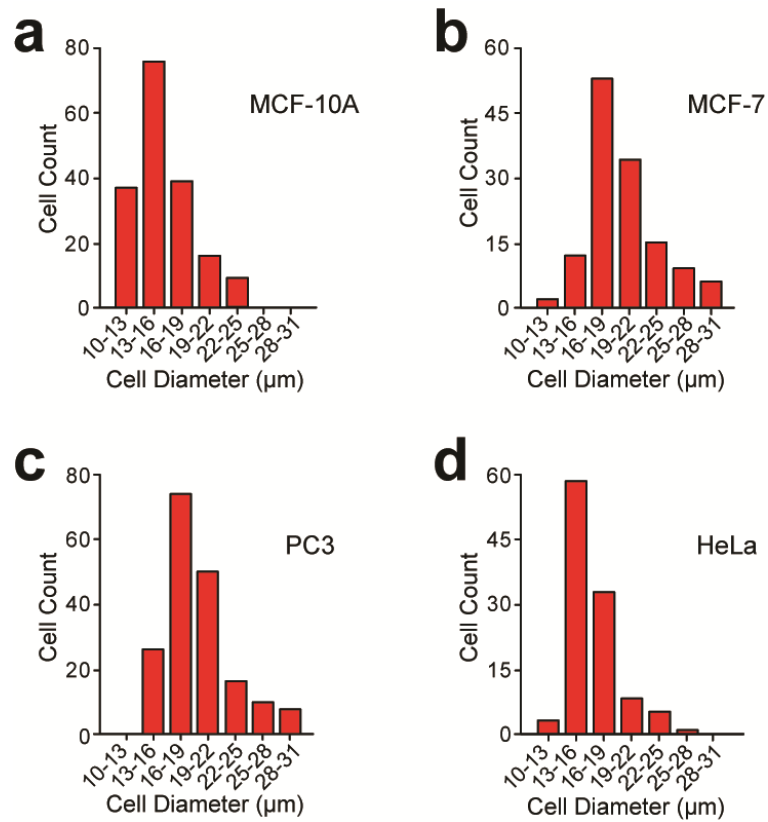

**Figure S2.** Histogram of cell diameter for MCF-10A ( $n = 180$ ), MCF-7 ( $n = 134$ ), PC3 ( $n = 173$ ), and HeLa cells ( $n = 105$ ). Data was obtained from three independent experiments.

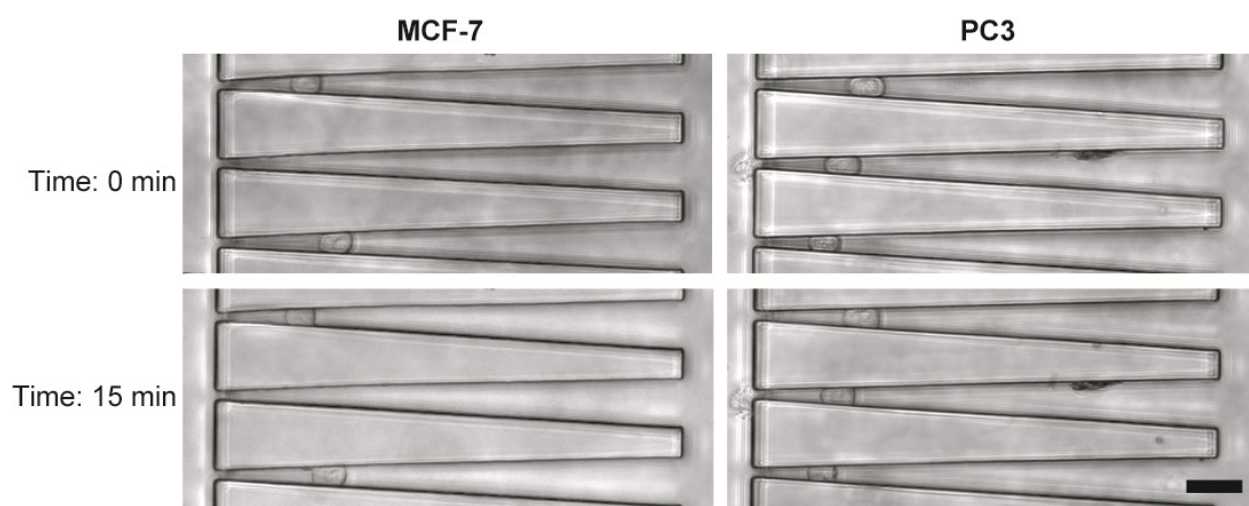

**Figure S3.** Representative images showing cell shapes of single MCF-7 (*left*) and PC3 cells (*right*) in confining channels immediately after initial cell trapping (top panel) or 15 min after initial cell trapping (bottom panel). Continuous trapping of MCF-7 and PC3 cells in confining channels coated with anti-EpCAM for 15 min led to some changes of cell shapes with enlarged cell contact areas. Scale bar, 50  $\mu\text{m}$ .

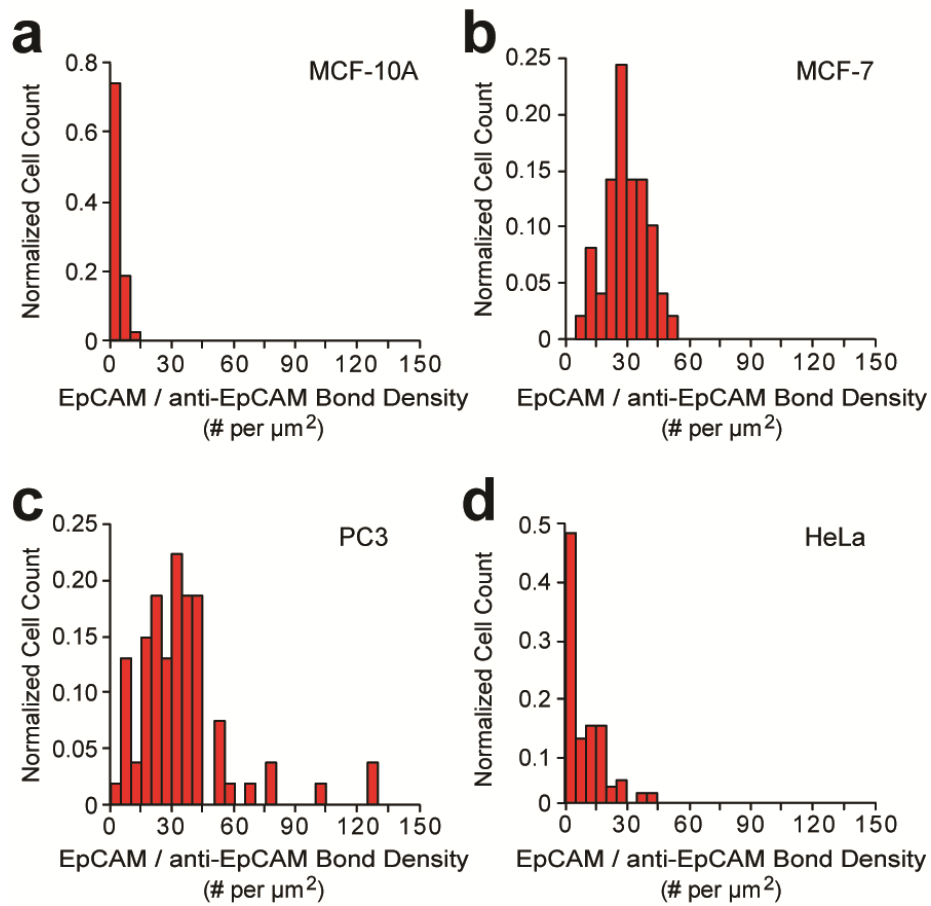

**Figure S4.** Distribution of single-cell surface EpCAM/anti-EpCAM bond density of the selected cell types ( $n > 50$ ).
